# Supplementary material for: Genome-wide characterisation of Foxa1 binding sites reveals several mechanisms for regulating neuronal differentiation in midbrain dopamine cells
Source: Oxford University Press journal article supplement (doi:10.1242/dev.115808), 2015-03-24
Supplement: dev115808supp.pdf [file dev115808supp.pdf]

**A**

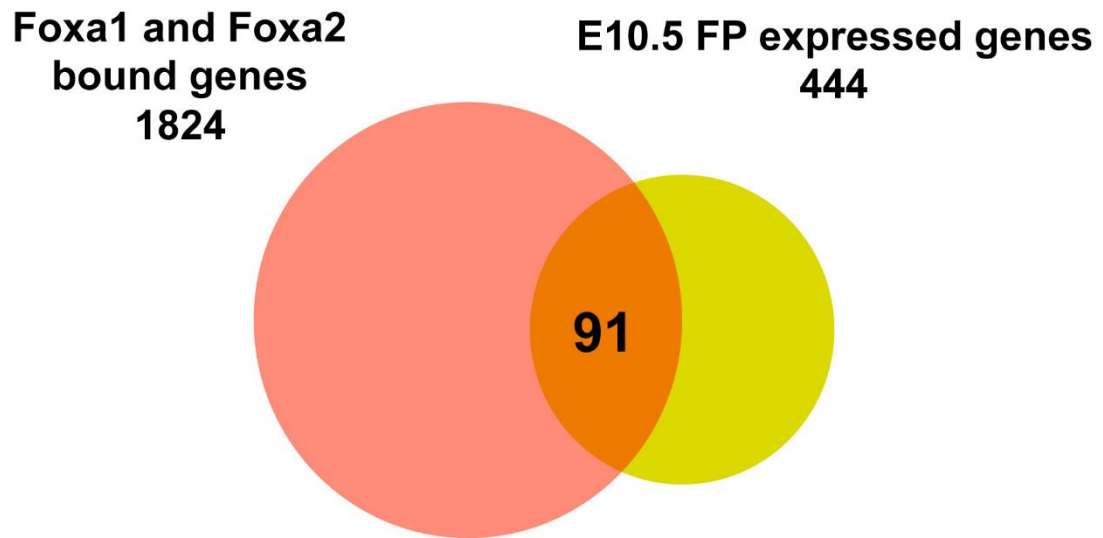

**B**

| Data set | FP       | Random |
|----------|----------|--------|
| Shared   | 91       | 29     |
| p-value  | 6.86E-31 | 0.015  |

Fig. S1. Venn diagram showing the overlap of Foxa1/2-bound genes and those preferentially expressed in the midbrain floor plate at E10.5 (A) and statistical analysis of the shared genes in A and the same number of randomly selected genes (B).

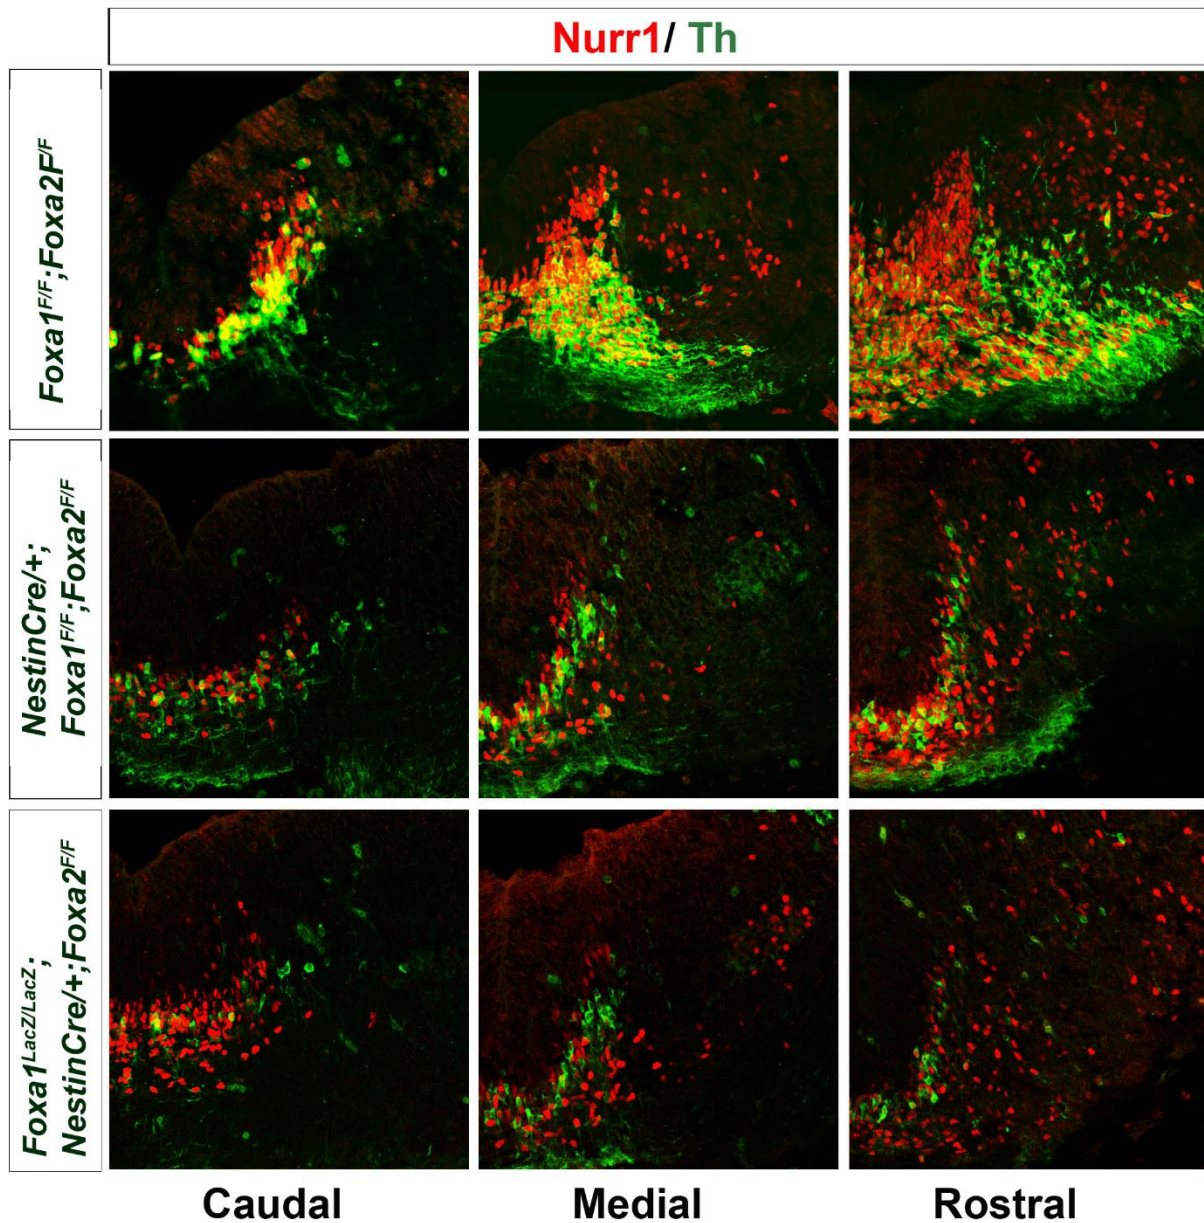

Fig. S2. A similar reduction was observed in the number of Nurr1+ and Nurr1+, Th+ mDA neurons in coronal sections through rostral, medial and caudal levels of the ventral midbrain of *NestinCre;Foxa1<sup>F/F</sup>;Foxa2<sup>F/F</sup>* and *Foxa1<sup>LacZ/LacZ</sup>; NestinCre;Foxa2<sup>F/F</sup>* compared with control *Foxa1<sup>F/F</sup>;Foxa2<sup>F/F</sup>* embryos at E12.5.

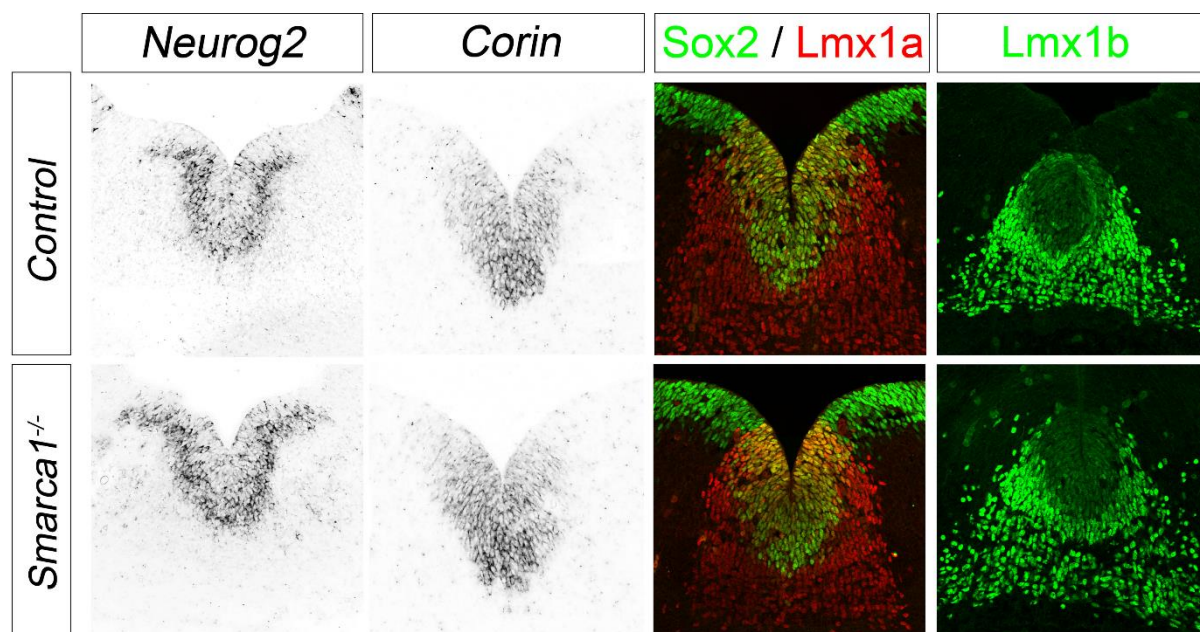

Fig. S3. Expression of mDA progenitor markers by *in situ* hybridisation and by immunohistochemistry was similar in coronal sections of the midbrain of control and *NestinCre;Foxa1/2* cko embryos at E12.5.

Table S1. Foxa1 ChIP-Seq peaks called by MACS. Data include: genomic coordinates, tag number, fold change, *P*-value, false discovery rate and closest TSS.

[Click here to Download Table S1](#)

Table S2. Foxa1 *in vivo* and Foxa2 *in vitro* co-bound genomic regions annotated to the closest TSS of genes expressed in mouse midbrain floor plate.

[Click here to Download Table S2](#)

Table S3. Overlap of differentially expressed genes identified by *in vivo* RNA-Seq analysis of wild-type versus *Nestin:Foxa1/2* cko ventral midbrains with genes associated to *in vivo* Foxa1 ChIP-Seq peaks. MGI identification codes and enriched Gene Ontology terms are also provided here.

[Click here to Download Table S3](#)

Table S4. Genomic coordinates discussed in the main manuscript including PCR primers used in ChIP-qPCR validation. Primers used in expression qPCR analysis are also mentioned here.

[Click here to Download Table S4](#)

Table S5. Foxa2 ChIP-Seq peaks called by MACS and their overlap with *in vitro* Foxa2-bound and *in vivo* Foxa1-bound genomic regions.

[Click here to Download Table S5](#)

Table S6. Overlap of Foxa2 *in vivo* ChIP-Seq peaks with Foxa1 *in vivo* ChIP-Seq peaks.

[Click here to Download Table S6](#)
